# Supplementary material
Source: publisher figshare collection journal article supplement (https://tandf.figshare.com/articles/dataset/_/7189238)
Supplement: Supplementary file 2 [file 1]

# Supplementary Table 1

2

| Compared<br>variable | Technique | Solution | V   | T <sub>bath</sub> | T <sub>inflow</sub> | T <sub>outflow</sub> | T <sub>urethra</sub> | T <sub>lumen</sub> | T <sub>bladder neck</sub> |      |      | T <sub>side wall</sub> |      |      | T <sub>dome</sub> |      |      |
|----------------------|-----------|----------|-----|-------------------|---------------------|----------------------|----------------------|--------------------|---------------------------|------|------|------------------------|------|------|-------------------|------|------|
|                      |           |          |     |                   |                     |                      |                      |                    | Subm                      | Detr | Ser  | Subm                   | Detr | Ser  | Subm              | Detr | Ser  |
| Volume               | C-HT      | H2O      | 100 | 36,9              | 46,6                | 44,0                 | 45,9                 | 42,7               | 41,6                      | 40,7 | 39,7 | 41,6                   | 40,5 | 39,2 | 41,7              | 41,1 | 39,5 |
|                      | C-HT      | H2O      | 50  | 36,8              | 46,6                | 44,4                 | 45,9                 | 43,3               | 41,6                      | 40,0 | 39,3 | 41,5                   | 41,1 | 39,3 | 42,4              | 41,4 | 39,8 |
|                      | RF-HT     | H2O      | 50  | 37,0              | 29,6                | 37,6                 | 36,5                 | 43,2               | 40,1                      | 39,6 | 38,7 | 40,4                   | 40,1 | 39,1 | 39,5              | 39,1 | 38,4 |
|                      | RF-HT     | H2O      | 100 | 36,7              | 31,7                | 38,2                 | 39,7                 | 43,3               | 40,2                      | 39,2 | 38,5 | 40,2                   | 40,2 | 39,3 | 39,9              | 39,6 | 38,8 |
| Solution             | C-HT      | H2O      | 50  | 36,9              | 45,8                | 44,8                 | 45,6                 | 42,6               | 42,2                      | 40,1 | 39,0 | 43,5                   | 40,0 | 38,7 | 42,3              | 40,2 | 39,0 |
|                      | RF-HT     | H2O      | 50  | 37,1              | 29,0                | 36,2                 | 37,2                 | 42,9               | 40,9                      | 42,3 | 41,7 | 41,9                   | 40,2 | 38,3 | 40,4              | 39,0 | 38,5 |
|                      | RF-HT     | NaCl     | 50  | 36,9              | 26,9                | 38,5                 | 36,2                 | 43,2               | 45,3                      | 43,0 | 40,7 | 46,2                   | 41,2 | 39,0 | 43,4              | 41,1 | 39,3 |
|                      | C-HT      | NaCl     | 50  | 36,9              | 46,8                | 45,6                 | 46,9                 | 42,6               | 43,0                      | 40,4 | 39,0 | 44,2                   | 40,4 | 38,5 | 42,6              | 40,4 | 39,0 |

3

## Supplementary Table 1. Experimental conditions & corresponding bladder wall temperatures with varying solutions and volumes in two pig bladders

5 All temperatures (T) are in °C. C-HT, conductive hyperthermia; Detr, detrusor; H2O, sterile water; NaCl, sodiumchloride 0.9% (i.e. saline); RF-HT,

6 radiofrequency-induced hyperthermia; Ser, serosa; Subm, submucosa; V, volume in ml.
