# Supplementary material
Source: publisher figshare collection journal article supplement (https://tandf.figshare.com/articles/dataset/_/7189238)
Supplement: Supplementary file 3 [file 1]

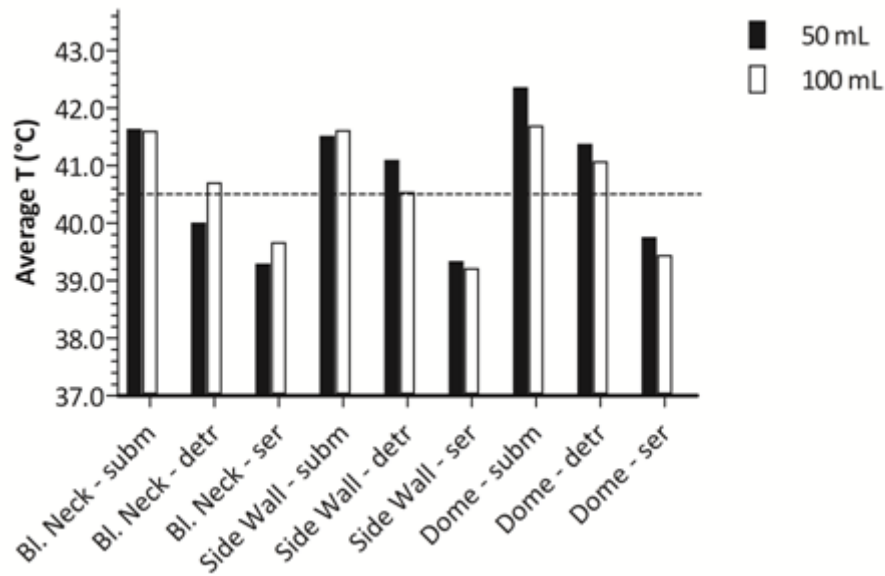

**Supplementary Figure 2. Bladder wall temperatures with a volume of 50ml vs. 100ml**

Comparison of intravesical volume (with C-HT and H<sub>2</sub>O). Average temperatures in the bladder wall. Dashed horizontal line represents the target temperature of 40.5°C.

C-HT, conductive hyperthermia; RF-HT, radiofrequency induced hyperthermia; T, temperature; Bl. Neck, bladder neck; subm, submucosa; detr, detrusor; ser, serosa.
